# Supplementary material
Source: Research Square preprint supplement (doi:10.21203/rs.3.rs-9761734/v1)
Supplement: Supplementary file 1 [file fa1fbc5c4c29066ea31e5bff.docx]

**Supplementary Tables**

**Supplementary Table 1** ICD10 codes for radical prostatectomy

| **Code** | **Diagnosis** |
| --- | --- |
| C61 | Malignant neoplasm of prostate |
| C80.1 | Malignant (primary) neoplasm, unspecified |
| D07.5 | Carcinoma in situ of prostate |
| D40.0 | Neoplasm of uncertain behavior of prostate |
| N42.32 | Atypical small acinar proliferation of prostate |
| R97.21 | Elevated prostate specific antigen |

**Supplementary Table 2** CPT codes for allowed concurrent procedures with radical prostatectomy

| **Code** | **Diagnosis** |
| --- | --- |
| 36620 | Arterial catheterization or cannulation for sampling, monitoring or transfusion (separate procedure) |
| 38500 | Biopsy or excision of lymph node(s) |
| 38562 | Limited lymphadenectomy for staging (separate procedure) |
| 38570 | Laparoscopy, surgical; with retroperitoneal lymph node sampling (biopsy), single or multiple |
| 38571 | Laparoscopy, surgical; with bilateral total pelvic lymphadenectomy |
| 38572 | Laparoscopy, surgical; with bilateral total pelvic lymphadenectomy and peri-aortic lymph node sampling (biopsy) |
| 38573 | Laparoscopy, surgical; with bilateral total pelvic lymphadenectomy and peri-aortic lymph node sampling |
| 38589 | Unlisted laparoscopy procedure, lymphatic system |
| 38760 | Inguinofemoral lymphadenectomy, superficial, including cloquet's node (separate procedure) |
| 38770 | Pelvic lymphadenectomy, including external iliac, hypogastric, and obturator nodes. (separate procedure) |
| 38780 | Retroperitoneal transabdominal lymphadenectomy, extensive, including pelvic, aortic, and renal nodes (separate procedure) |
| 44005 | Enterolysis (freeing of intestinal adhesions) (separate procedure) |
| 44180 | Laparoscopy, surgical, enterolysis (freeing of intestinal adhesion) (separate procedure) |
| 49320 | Laparoscopy, abdomen, peritoneum, and omentum, diagnostic, with or without collection of specimen(s) by brushing or washing (separate procedure) |
| 49321 | Laparoscopy, surgical; with biopsy (single or multiple) |

**Supplementary Table 3** ICD10 codes for simple prostatectomy

| **Code** | **Diagnosis** |
| --- | --- |
| D29.1 | Benign neoplasm of prostate |
| N13.8 | Other obstructive and reflux uropathy |
| N21.0 | Calculus in bladder |
| N39.0 | Urinary tract infection, site not specified" |
| N40 | Benign prostatic hyperplasia |
| N40.0 | Benign prostatic hyperplasia without lower urinary tract symptom |
| N40.1 | Benign prostatic hyperplasia with lower urinary tract symptoms |
| N40.2 | Nodular prostate without lower urinary tract symptoms |
| N40.3 | Nodular prostate with lower urinary tract symptoms |
| N41.1 | Chronic prostatitis |
| N41.9 | Inflammatory disease of prostate, unspecified |
| R33.8 | Other retention of urine |
| R33.9 | Retention of urine, unspecified |

**Supplementary Table 4** CPT codes for allowed concurrent procedures with simple prostatectomy

| **Code** | **Diagnosis** |
| --- | --- |
| 44180 | Laparoscopic removal of intestinal adhesions. |
| 51040 | Cystostomy, cystotomy with drainage |
| 51050 | Cystolithotomy, cystotomy with removal of calculus, without vesical neck resection |

**Article title:**

Single-Port Robotic Prostatectomy is Associated with Hospitalization: Evidence from the NSQIP Database

**Journal name:**

*World Journal of Urology*

## **Author names:**

## Brendan K. Wallacea, Devin M. Dishonga, Andrew J. Cohena

## **Affiliation:**

## aJames Buchanan Brady Urological Institute, Johns Hopkins University School of Medicine, 600 N Wolfe St, Baltimore, MD, USA 21287

**Corresponding email:**

Bwalla25@jhmi.edu
